# Supplementary material for: A novel textile-like carbon wrapping for high-performance silicon anodes in lithium-ion batteries
Source: Royal Society of Chemistry journal article supplement (doi:10.1039/c8ta01414k), 2018-01-01
Supplement: c8ta01414k1.pdf [file c8ta01414k1.pdf]

## Supplementary information

### **A Novel Textile-like Carbon Wrapping for High-performance Silicon Anodes in Lithium-ion Batteries**

*Jong Min Kim<sup>a</sup>, Valentina Guccini<sup>b</sup>, Dongwon Kim<sup>a</sup>, Jiseop Oh<sup>a</sup>, Seungman Park<sup>a</sup>, Youngmoo Jeon<sup>a</sup>, Taejin Hwang<sup>a</sup>, German Salazar-Alvarez<sup>\*b</sup>, Yuanzhe Piao<sup>\*a,c</sup>*

<sup>a</sup> Graduate School of Convergence Science and Technology, Seoul National University, 145 Gwanggyo-ro, Yeongtong-gu, Suwon-Si, Gyeonggi-do, 16229, Republic of Korea

<sup>b</sup> Department of Materials and Environmental Chemistry, Arrhenius Laboratory, Stockholm University, Stockholm, SE-106 91, Sweden

<sup>c</sup> Advanced Institutes of Convergence Technology, 145 Gwanggyo-ro, Yeongtong-gu, Suwon-si, Gyeonggi-do, 16229, Republic of Korea

\*Corresponding authors.

E-mail: parkat9@snu.ac.kr (Y. Piao) Tel: +82-31-888-9141

E-mail: german@mmk.su.se (G. Salazar-Alvarez) Tel: +46-816-3942

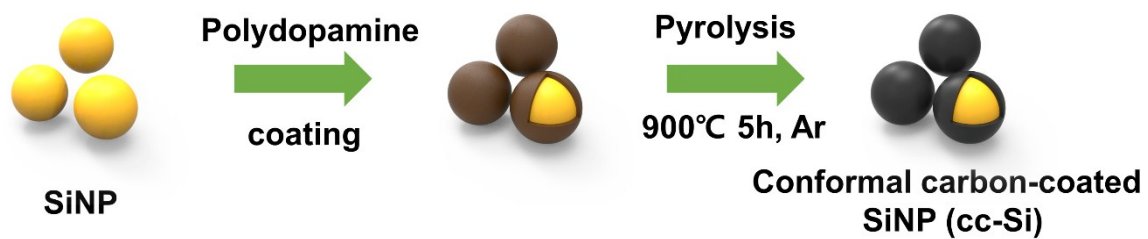

**Fig. S1** A schematic illustration of cc-Si synthesis process.

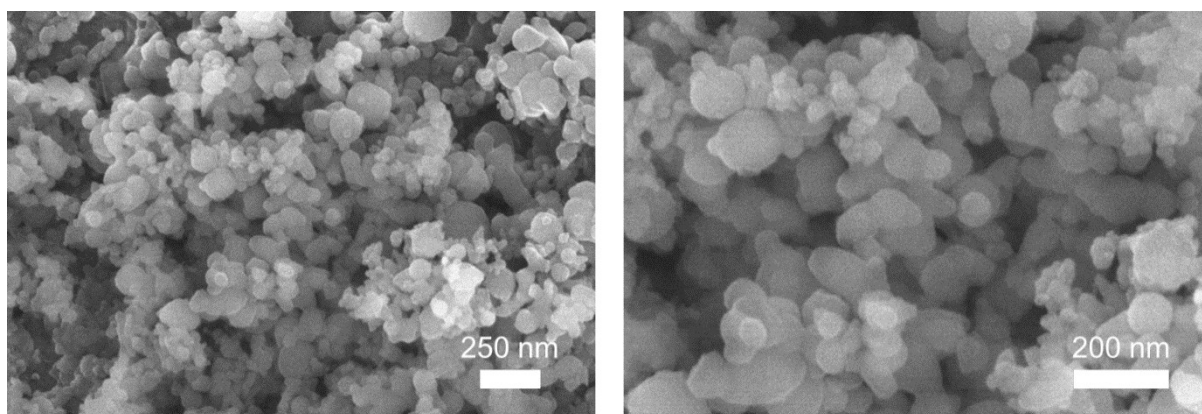

**Fig. S2** SEM images of Bare-Si powder.

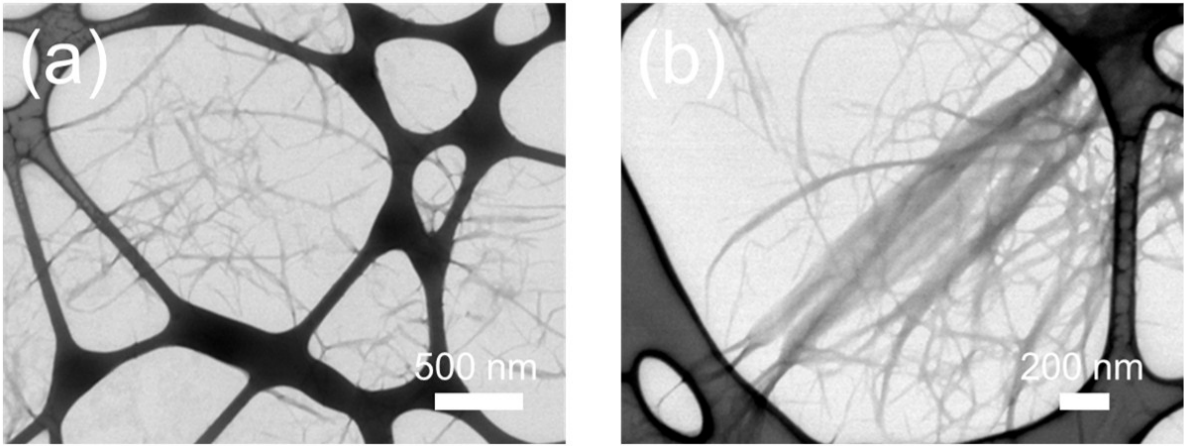

**Fig. S3** STEM images of (a) dispersed and (b) agglomerated enzymatically hydrolyzed cellulose nanofibers.

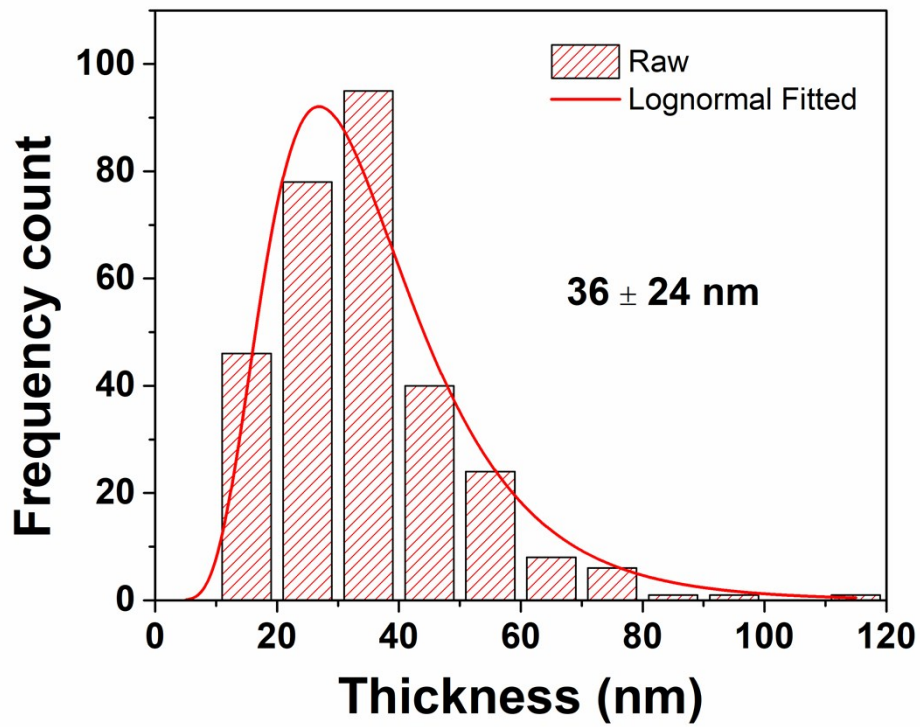

**Fig. S4** The thickness of enzymatically hydrolyzed cellulose nanofibers.

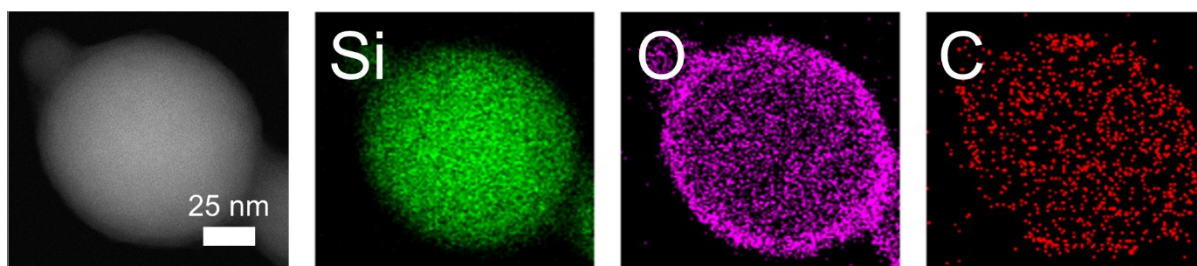

**Fig. S5** EDS analysis images of cc-Si with the element mapping of silicon, oxygen and carbon.

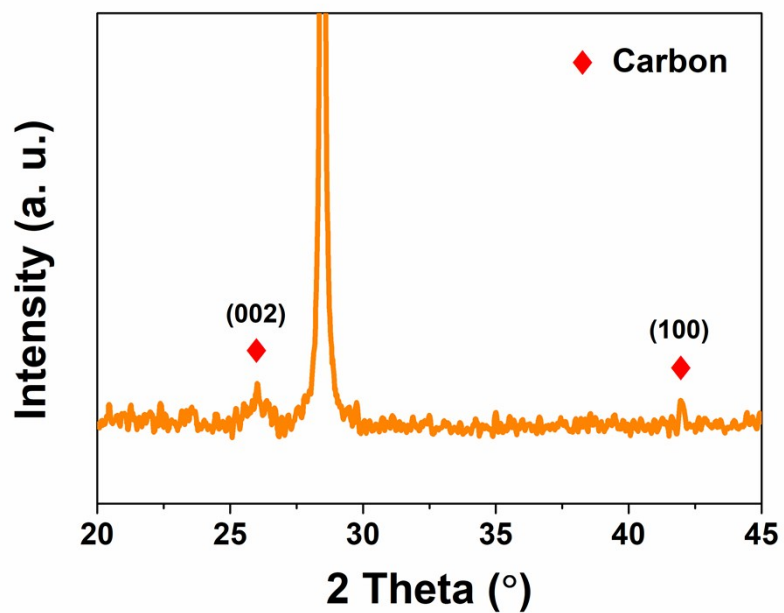

**Fig. S6** Local XRD pattern of ctex-Si.

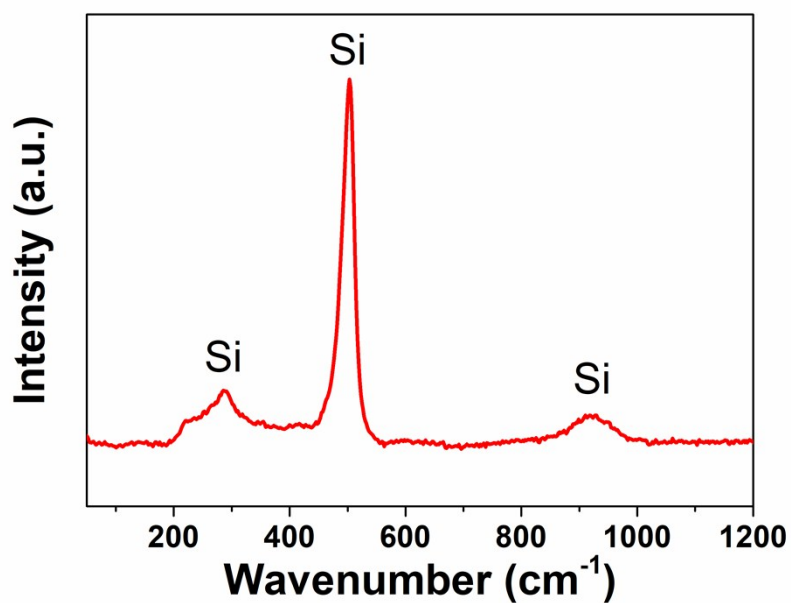

Fig. S7 Raman spectrum of ctex-Si.

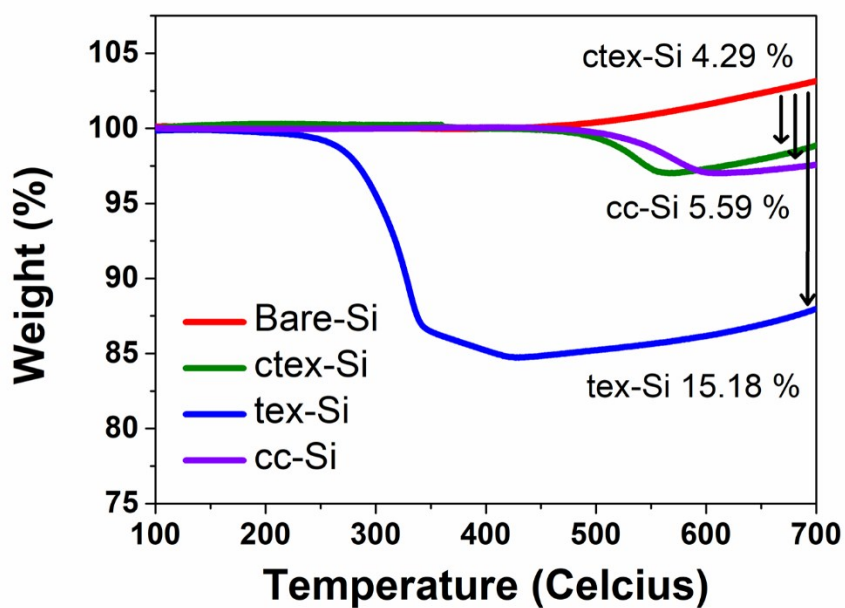

$$\text{C content (\%)} = \text{The weight of Bare-Si at } 700\text{ }^{\circ}\text{C} - \text{The weight of a sample at } 700\text{ }^{\circ}\text{C}$$

Fig. S8 TGA graph of Bare-Si, cc-S, tex-Si and ctex-Si. The equation for C content calculation.

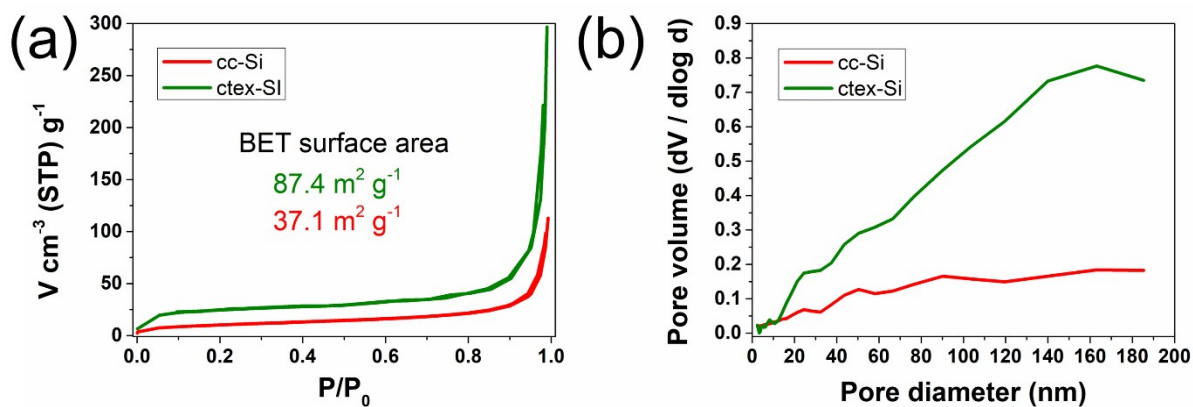

**Fig. S9** (a)  $\text{N}_2$  adsorption/desorption isotherms of cc-Si and ctex-Si. (b) BJH pore distribution diagrams of cc-Si and ctex-Si.

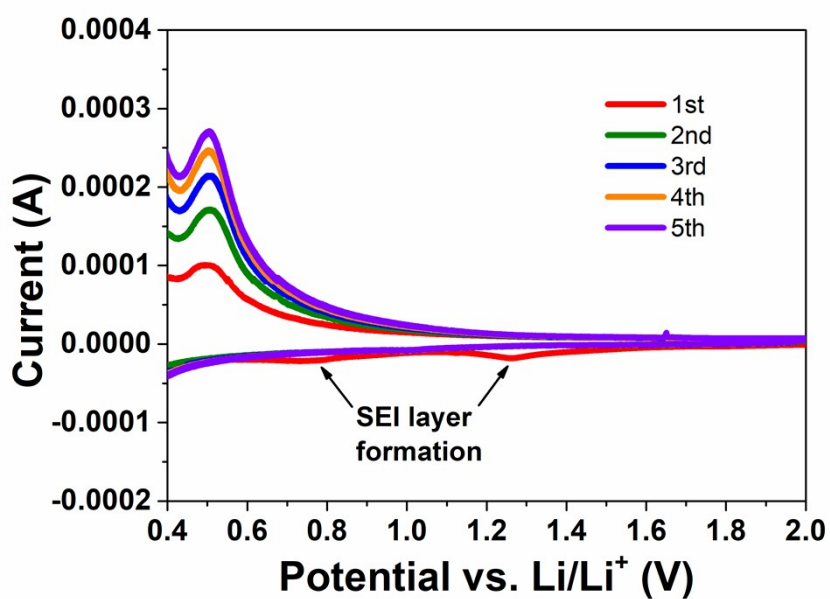

**Fig. S10** A magnified CV curve of ctex-Si.



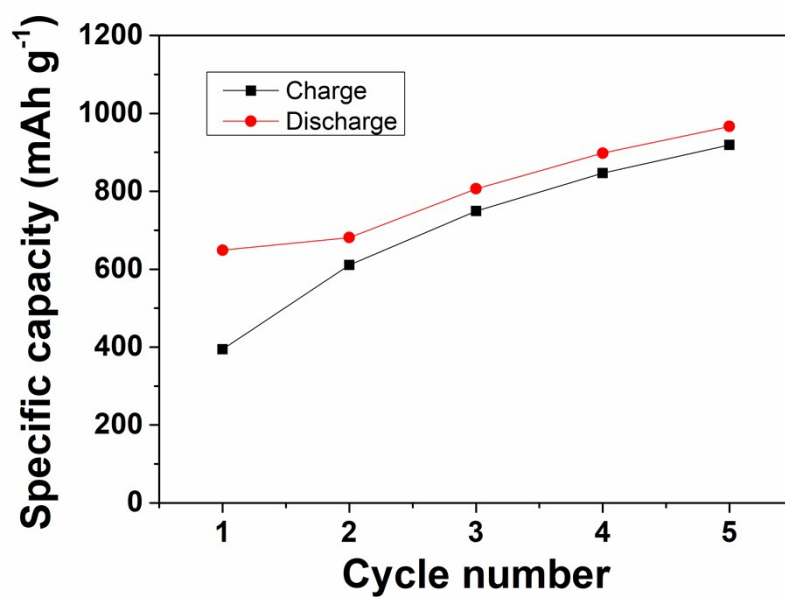

**Fig. S11** Specific capacity of ctex-Si during CV with a scan rate of  $0.1 \text{ mV s}^{-1}$ .

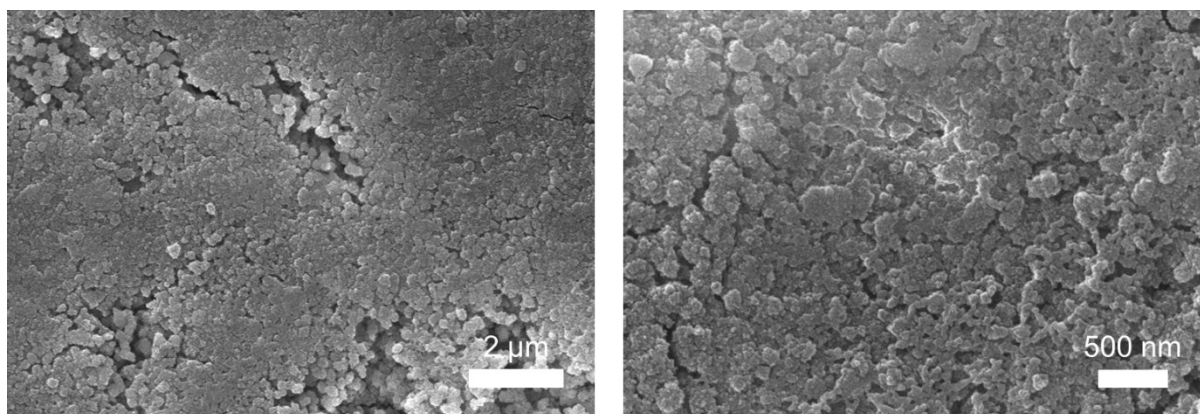

**Fig. S12** SEM images of a ctex-Si electrode after 500 cycles at  $2.0 \text{ A g}^{-1}$ .

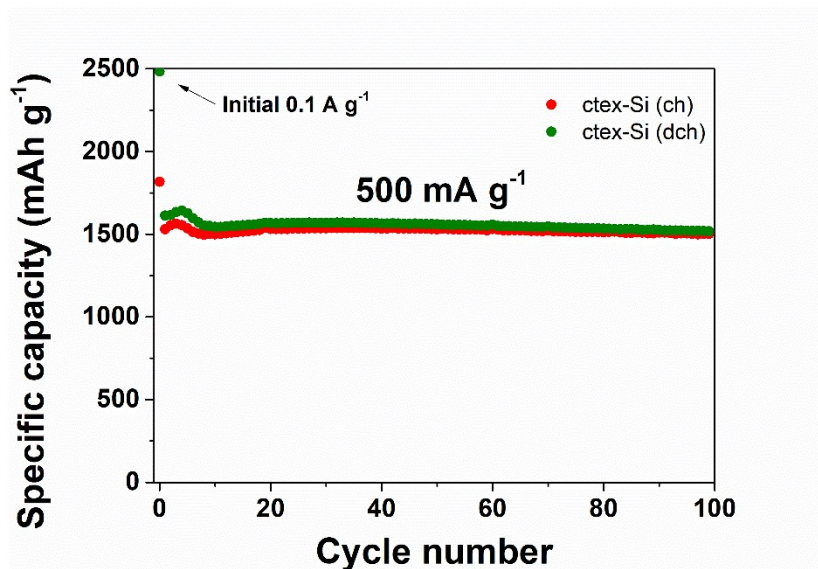

**Fig. S13** Cycling performance of ctex-Si for 100 cycles at 500 mA g<sup>-1</sup>.

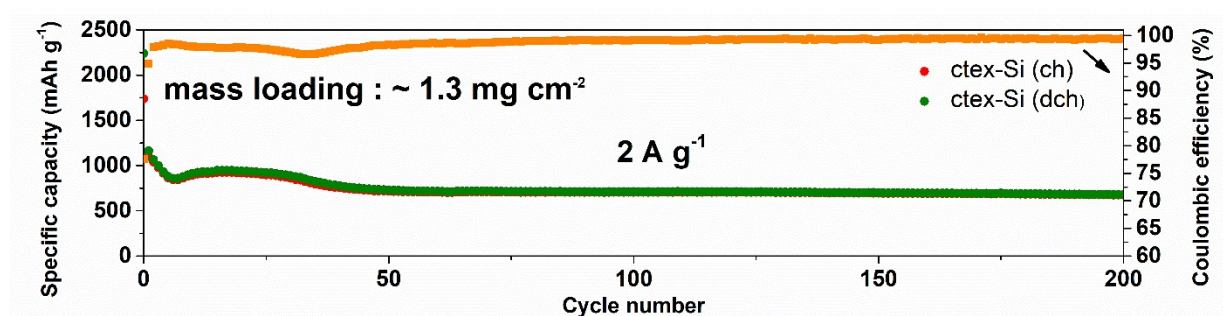

**Fig. S14** Cycling performance of ctex-Si with higher active material mass loading ( $\sim 1.3$  mg cm<sup>-2</sup>) for 200 cycles at 2 A g<sup>-1</sup>.

**Table S1.** EIS parameters for the fresh and 100 cycled cell of cc-Si and ctex-Si.

| Sample         | $R_S$ ( $\Omega$ ) | $R_{SEI}$ ( $\Omega$ ) | $R_{ct}$ ( $\Omega$ ) | Reduced Chi-square    |
|----------------|--------------------|------------------------|-----------------------|-----------------------|
| Fresh cc-Si    | $4.26 \pm 0.06$    | -                      | $6.37 \pm 0.57$       | $1.01 \times 10^{-4}$ |
| Fresh ctex-Si  | $4.53 \pm 0.05$    | -                      | $3.84 \pm 0.14$       | $1.17 \times 10^{-4}$ |
| Cycled cc-Si   | $3.09 \pm 0.04$    | $19.34 \pm 0.14$       | $17.83 \pm 0.36$      | $4.79 \times 10^{-5}$ |
| Cycled ctex-Si | $3.89 \pm 0.05$    | $11.54 \pm 0.14$       | $4.85 \pm 0.31$       | $1.23 \times 10^{-4}$ |



**Table S2.** Comparison table with other carbon-coated silicon, yolk-shell structured silicon and silicon-carbon composite.

| Sample                                                         | Synthesis Method                  | Carbon source                 | Si (wt%) In active | Active: conductive additive: binder | Total carbon content (%) | Retention (%) (Cycle)   | A g <sup>-1</sup> | Ref             |
|----------------------------------------------------------------|-----------------------------------|-------------------------------|--------------------|-------------------------------------|--------------------------|-------------------------|-------------------|-----------------|
| <b>Textile-like carbon wrapped silicon</b>                     | <b>Pyrolysis</b>                  | <b>Cellulose nanofiber</b>    | <b>95.71</b>       | <b>70:15:15</b>                     | <b>18.0</b>              | <b>94.5 (500)</b>       | <b>2</b>          | <b>Our work</b> |
| Yolk-shell Si@void@C                                           | Sol-gel / HF etching              | Polydopamine                  | 71                 | 65:20:15                            | 38.8                     | 74 (1000)               | 4.2               | Ref S1          |
| Yolk-shell silicon-mesoporous carbon                           | Sol-gel / HF etching              | Phenolic resin                | 73.3<br>42.2       | 60:20:20                            | 36.02<br>54.6            | ~ 29 (400)<br>63 (400)  | 0.42              | Ref S2          |
| Nonfilling carbon-coated porous silicon                        | Pyrolysis / HF etching            | Resorcinol-formaldehyde resin | 89                 | 80:10:10                            | 18.8                     | 100 (1000)              | 1.05              | Ref S3          |
| a phenolic resin-based carbon interfacial coated silicon       | Sol-gel / Pyrolysis               | Resorcinol-formaldehyde resin | 81.7               | 60:20:20                            | 30.9                     | 69 (200)                | 0.5               | Ref S4          |
| Nanosized core/shell silicon@carbon                            | Pyrolysis                         | Polyvinylidene fluoride       | 95.7               | 60:16:24                            | 18.6                     | 97 (30)                 | 0.05              | Ref S5          |
| Cocoon-like silicon based composite (porous Si@void@N-doped C) | Magnesium-thermic reduction / CVD | Pyridine vapor                | 79.3               | 85:0:15                             | 18.1                     | 84.9 (300)<br>100 (300) | 2<br>16           | Ref S6          |
| Silicon Nanoparticles Embedded in Micro-Carbon                 | Hydro-thermal / Pyrolysis         | Sucrose                       | 30.5               | 60:20:20                            | 61.4                     | 93.5 (500)              | 0.8               | Ref S7          |
| double-shelled-yolkstructured silicon (carbon@void@silicon)    | CVD / HCl etching                 | Acetylene                     | 60 (Carbon =24)    | 60:20:20                            | 34.4                     | 84.6 (1000)             | 5                 | Ref S8          |

## References

- S1. N. Liu, H. Wu, M. T. McDowell, Y. Yao, C. M. Wang and Y. Cui, *Nano Lett.*, 2012, **12**, 3315-3321.
- S2. J. P. Yang, Y. X. Wang, S. L. Chou, R. Y. Zhang, Y. F. Xu, J. W. Fan, W. X. Zhang, H. K. Liu, D. Y. Zhao and S. X. Dou, *Nano Energy*, 2015, **18**, 133-142.
- S3. Z. D. Lu, N. Liu, H. W. Lee, J. Zhao, W. Y. Li, Y. Z. Li and Y. Cui, *ACS Nano*, 2015, **9**, 2540-2547.
- S4. W. Luo, Y. X. Wang, S. L. Chou, Y. F. Xu, W. Li, B. Kong, S. X. Dou, H. K. Liu and J. P. Yang, *Nano Energy*, 2016, **27**, 255-264.
- S5. Y. H. Xu, G. P. Yin, Y. L. Ma, P. J. Zuo and X. Q. Cheng, *J. Mater. Chem.*, 2010, **20**, 3216-3220.
- S6. F. H. Du, Y. Z. Ni, Y. Wang, D. Wang, Q. Ge, S. Chen and H. Y. Yang, *ACS Nano*, 2017, **11**, 8628-8635.
- S7. M. G. Jeong, H. L. Du, M. Islam, J. K. Lee, Y. K. Sun and H. G. Jung, *Nano Lett.*, 2017, **17**, 5600-5606.
- S8. Y. J. Liu, Z. X. Tai, T. F. Zhou, V. Sencadas, J. Zhang, L. Zhang, K. Konstantinov, Z. P. Guo and H. K. Liu, *Adv. Mater.*, 2017, **29**. 1703028
